# Supplementary material for: Manipulating the crystallization and interfacial charge behavior with a jellyfish-like molecular template for efficient perovskite solar cells
Source: Royal Society of Chemistry journal article supplement (doi:10.1039/d3qi02016a), 2023-12-11
Supplement: d3qi02016a1.pdf [file d3qi02016a1.pdf]

**Manipulating the crystallization and interfacial charge behavior with a jellyfish-like molecular template for efficient perovskite solar cells**

Haoyan Wang<sup>1</sup>, Chenyu Zhao<sup>1</sup>, Lin Fan<sup>1, 2</sup>, Maobin Wei<sup>1, 2</sup>, Huilian Liu<sup>1, 2</sup>, Xiaoyan Liu<sup>1, 2</sup>, Jinghai Yang<sup>1, 2\*</sup>, Fengyou Wang<sup>1, 2\*</sup>, Lili Yang<sup>1, 2\*</sup>

1. Key Laboratory of Functional Materials Physics and Chemistry of the Ministry of Education, Jilin Normal University, Changchun 130103, China
2. National Demonstration Center for Experimental Physics Education, Jilin Normal University, Siping 136000, China

Corresponding author:

Jinghai Yang, e-mail address: *jhyang1@jlnu.edu.cn*

Fengyou Wang, e-mail address: *wfy@jlnu.edu.cn*

Lili Yang, e-mail address: *llyang1980@163.com*

### Supplementary note 1

**Materials:** Indium Tin Oxides (ITO) glass substrates, lead iodide ( $\text{PbI}_2$ ), Methylammonium iodide ( $\text{CH}_3\text{NH}_3\text{I}$ , MAI), 4-tert-butylpyridine and lithium bis (trifluoromethanesulfonyl) imide (Li-TFSI),  $\text{SnO}_2$  aqueous colloidal dispersion (15wt%, ALFA), 2,2',7,7'-tetrakis (N,N-dip-methoxyphenylamine) 9,9'-Spirobifluorene (Spiro-OMeTAD) and all anhydrous solvents were purchased from YOUXUAN Technology Co. Ltd. (China).  $\text{MoS}_2$  was purchased by Nanjing XFNANO Materials Tech Co. Ltd. Glycine was purchased by Aladdin (China). All chemicals and reagents were used as received from chemical companies without any further purification.

### Supplementary note 2

**Fabrication of perovskite solar cells:**  $\text{SnO}_2$  was used as ETL, which was coated on the ITO glass sheet by spin-coating. The deposited ITO glass is transferred to a nitrogen-filled glove box ( $\text{H}_2\text{O}$  and  $\text{O}_2 < 1$  ppm) to spin-coating the perovskite film which was prepared by 693 mg of  $\text{PbI}_2$ , 245 mg of MAI, and different concentrations BDP dissolving in a mixed solvent of Dimethyl sulfoxide (DMSO) and Dimethyl formamide (DMF) ( $v:v = 3:7$ ). The 80  $\mu\text{L}$  of the  $\text{MAPbI}_3$  precursor solution was deposited onto the ITO/ $\text{SnO}_2$  layer by a spin coating process, i.e., 500 rpm for 10 s, 4000 rpm for 30s. 400  $\mu\text{L}$  of chlorobenzene (CB) was poured on the rotating substrate 28 s after the start of the procedure. Subsequently, the obtained films were dried at 60°C for 5 min and at 100°C for 10 min. The 75  $\mu\text{L}$  of the mixture hole transport layer solution prepared by mixing 72.3 mg of Spiro-OMeTAD, 18.5  $\mu\text{L}$  with a solution of 500 mg/mL Li-TFSI in acetonitrile and 28.5  $\mu\text{L}$  of 4-tertbutylpyridine in 1 mL of CB was spin-coated on the prepared  $\text{MAPbI}_3$  films at 3000 rpm for 30 s. Finally, 100 nm Ag was thermally deposited under vacuum condition.

**Fabrication of JLMT:** Firstly, 0.1 mg glycine was dissolved in 1 ml deionized water, then coated on SnO<sub>2</sub> at 2000 RMP and annealed at 100 °C for 10 min. Subsequently, 0.1 mg of MoS<sub>2</sub> was dissolved in 1 ml of deionized water and dispersed in ultrasonic machine for 30 min. And then we spun on glycine at 2000 RMP and annealed at 100 °C for 10 min.

### **Supplementary note 3**

**Characterization:** The scanning electron microscope (SEM) images and energy dispersive spectroscopy (EDS) linear-scan were taken using a Hitachi S-4800. NMR was measured by Bruker Avance III 400MHz, American. TEM and HRTEM images were measured by JEOL 2100F, Japan. KPFM were measured by Park NX20, Korea. The optical properties of the films were analyzed using an UV-Vis-near-infrared. Fourier transform infrared spectroscopy (FTIR) was measured by Nicolet iS10, America. The crystal structure was carried out by X-ray diffraction (XRD) (Japan Rigaku D/max-ga X-ray diffractometer) using Cu K $\alpha$  ( $\lambda = 0.15406$  nm) source. PL spectra were obtained using a PL microscopic spectrometer (FLS1000, China) with a 385 nm CW laser excitation source. The TRPL (FLS1000, China) were measured by using an excitation wavelength of 385nm. The main corresponding setup consisted of perovskite, mica-flakes. X-ray photoelectron spectroscopy (XPS) was used to obtain the information on the chemical states of the control and BDP-perovskite film (measured by Escalab250Xi, Germany). Grazing incidence wide-angle X-ray scattering (GIWAXS) was tested at Shanghai BL14B1 station with a light intensity of 10 keV. *J-V* characterizations was carried out was carried out under AM 1.5 G simulated sunlight illuminations (100 mW cm<sup>-2</sup>, Model 94043A, Oriel, American). The spectral responses were obtained from an EQE measurement system (Newport PV measurement, American).

### **Supplementary note 4**

**Theoretical calculation:** In this paper, the theoretical calculations were performed by density function (DFT) methods. The calculations of electrostatic potential (ESP) were conducted on the Gaussian 09 program by using B3PW91 and the all-electron double- $\xi$  valence basis sets of 3-21G\*. The calculations of highest occupied molecular orbital (HOMO) and the lowest occupied molecular orbital (LUMO) were conducted on the Gaussian 09 program by using B3PW91 and the all-electron double- $\xi$  valence basis sets of 3-21G\*.

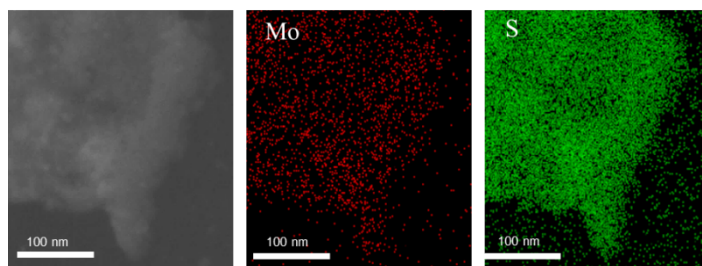

Fig. S1 The EDS image of Mo and S for the MoS<sub>2</sub> nanosheet.

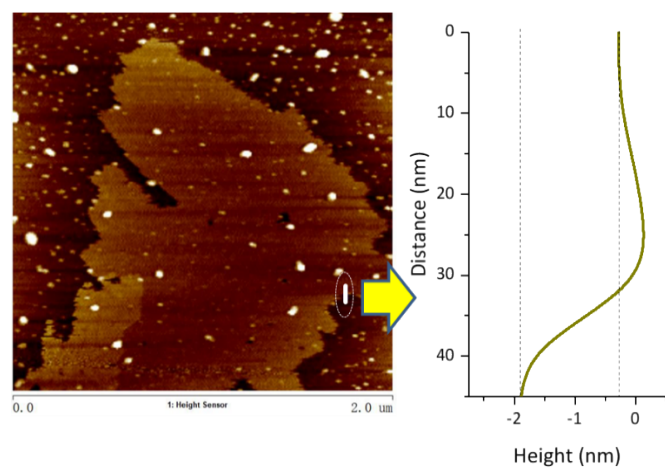

Fig. S2 AFM image of MoS<sub>2</sub> nanosheet with ~1.5 nm thickness.

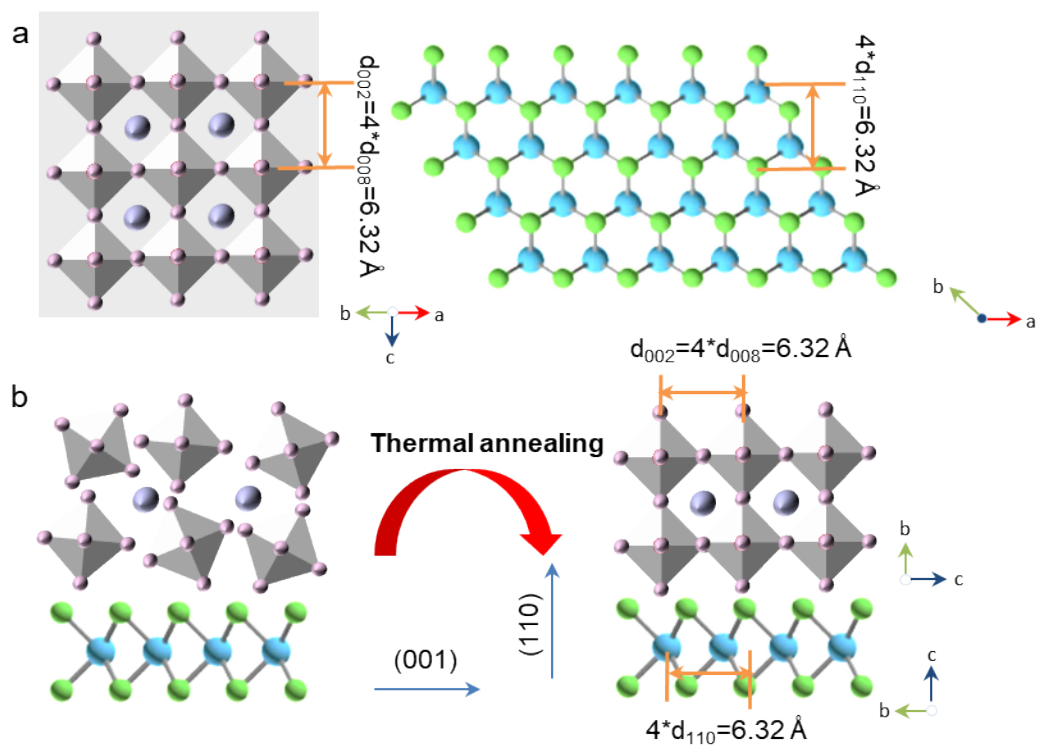

Fig. S3 (a) Atomic crystal structure of the (001) plane of MoS<sub>2</sub> and the (110) plane of the perovskite. (b) Schematic diagram of the vdW epitaxial growth of a MAPbI<sub>3</sub> grain on a MoS<sub>2</sub> surface.

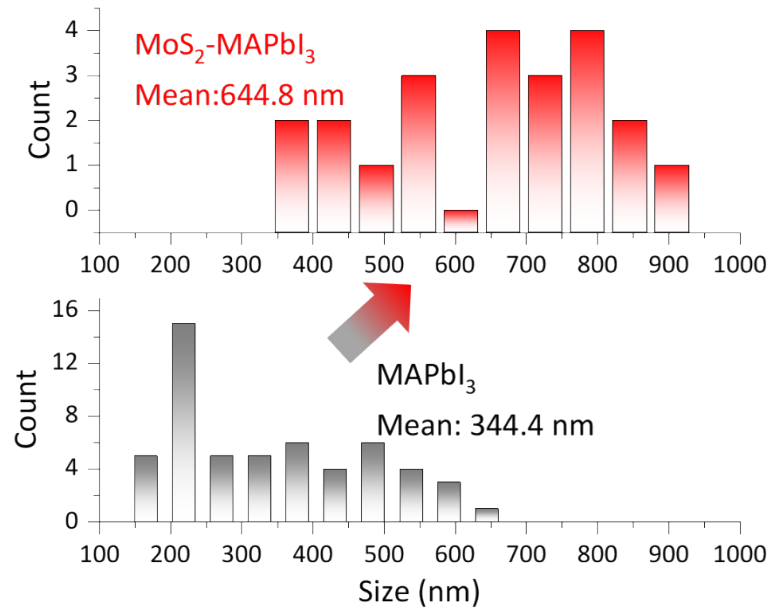

Fig. S4 Histogram for the MAPbI<sub>3</sub> and the MoS<sub>2</sub>-MAPbI<sub>3</sub> film with different grain sizes.



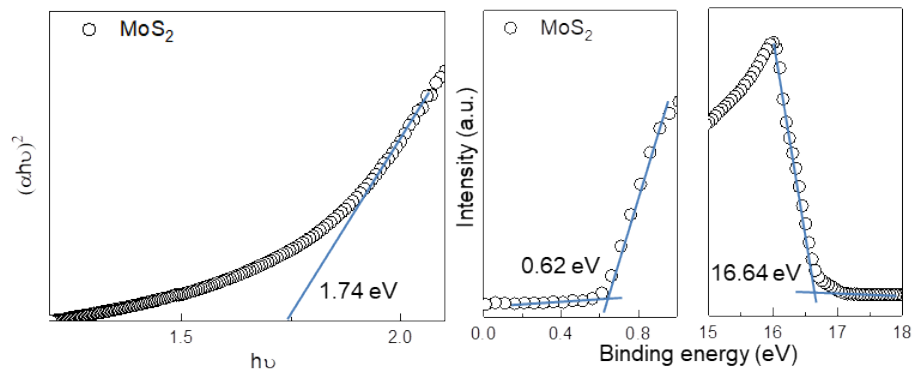

Fig. S5 Optical bandgap and UPS of MoS<sub>2</sub>.

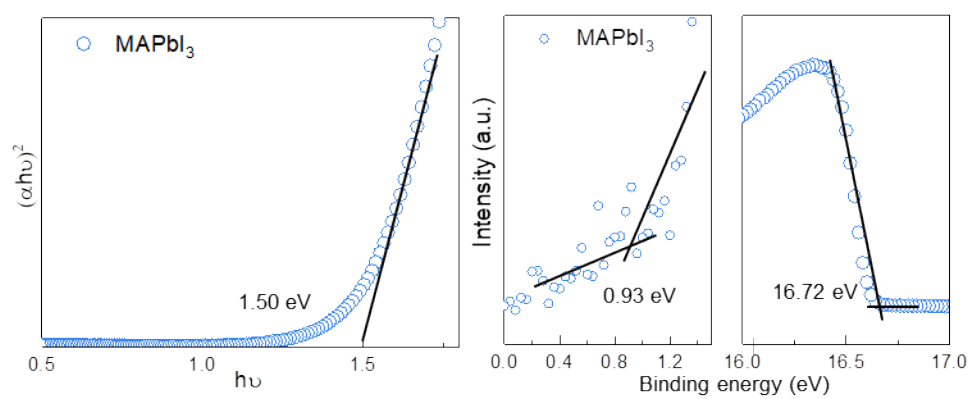

Fig. S6 Optical bandgap and UPS of MAPbI<sub>3</sub>.

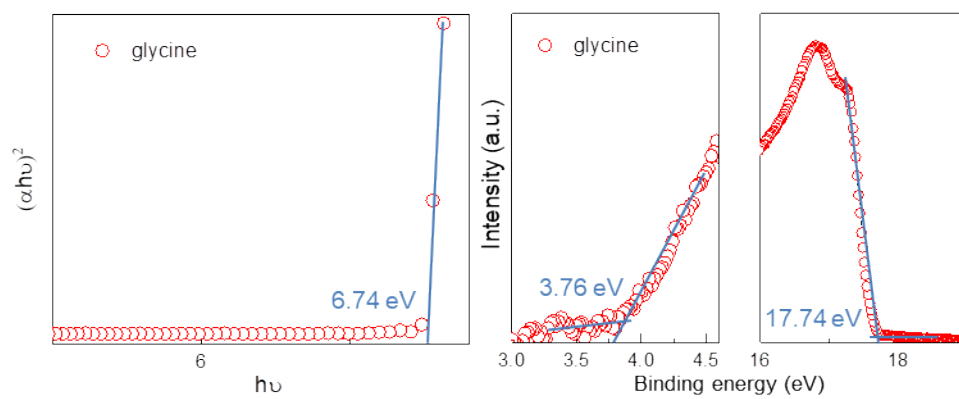

Fig. S7 Optical bandgap and UPS of glycine. Based on this data, the LUMO,  $E_F$ , and HOMO levels of glycine are determined as  $-0.50$  eV,  $-3.48$  eV, and  $-7.24$  eV.

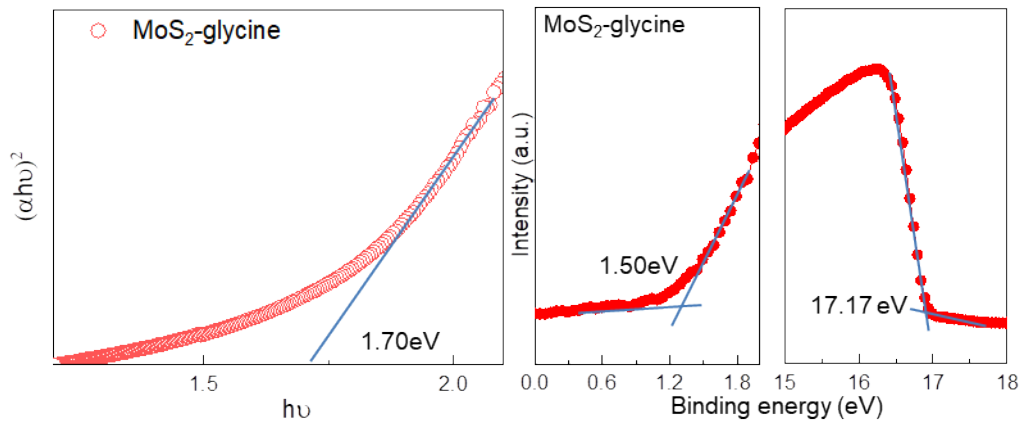

Fig. S8 Optical bandgap and UPS MoS<sub>2</sub>-glycine.

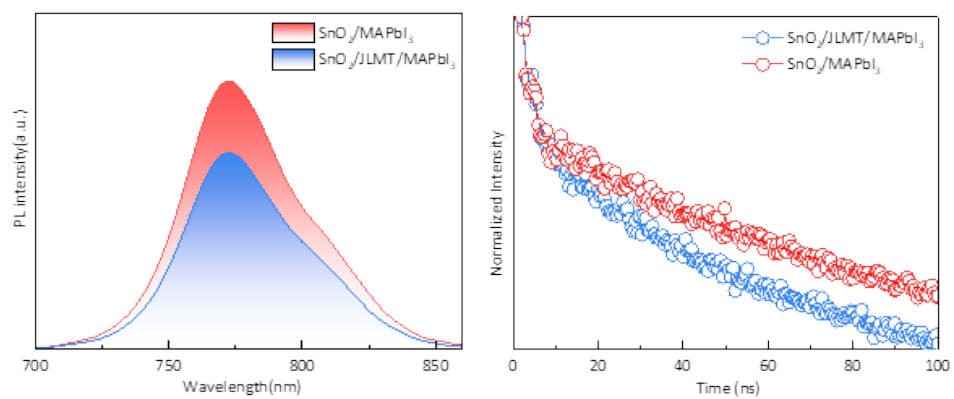

Fig. S9 PL and TRPL of the control- and JLMT-perovskite film.

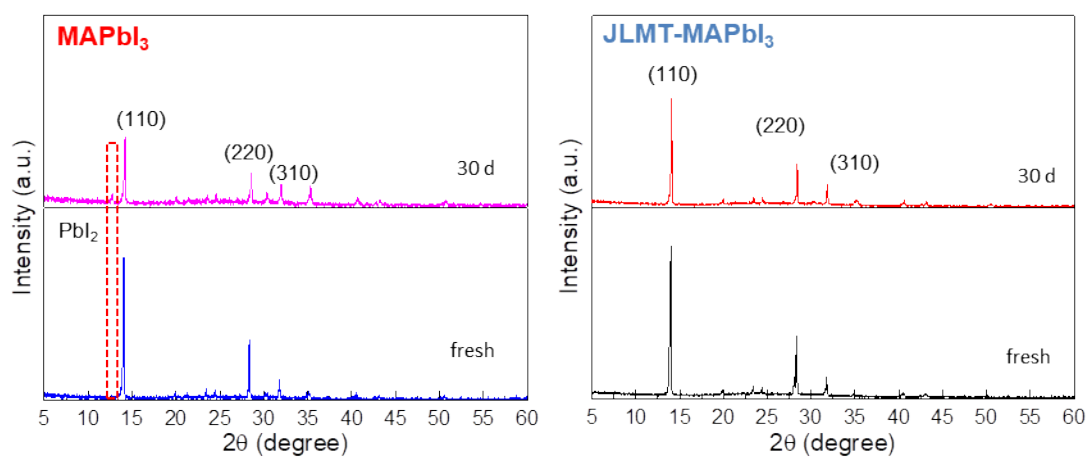

Fig. S10 XRD patterns of the fresh and aged films (exposure to ~40% RH, ~25°C for 30 days) of the MAPbI<sub>3</sub> and the JLMT-MAPbI<sub>3</sub> films.

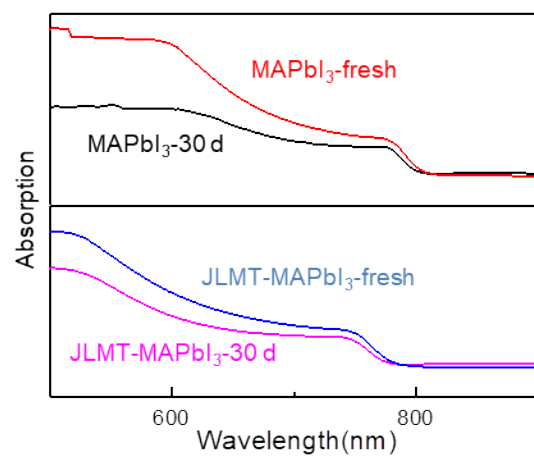

Fig. S11 The UV-vis absorption spectrum of the MAPbI<sub>3</sub> and JLMT-MAPbI<sub>3</sub> films (exposure to ~40% RH, ~25°C for 30 days).

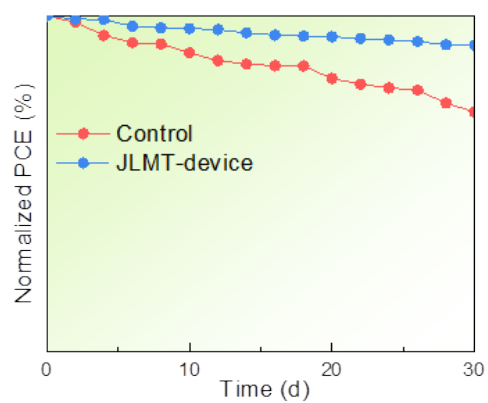

Fig. S12 *PCE* changes of the control- and the JLMT-device.



**Table S1.** TRPL lifetimes of the MAPbI<sub>3</sub> and JLMT-MAPbI<sub>3</sub> film.

| Sample                  | $\tau_1$ (ns) | $\tau_2$ (ns) |
|-------------------------|---------------|---------------|
| MAPbI <sub>3</sub>      | 2.24          | 112.08        |
| JLMT-MAPbI <sub>3</sub> | 2.76          | 69.79         |

**Table S2.** The illuminated output parameters of PSCs

|               | $J_{SC}$ (mA cm <sup>-2</sup> ) | $V_{OC}$ (V) | $FF$ (%) | $PCE$ (%) |
|---------------|---------------------------------|--------------|----------|-----------|
| Control-R     | 21.85                           | 1.13         | 74.81    | 18.48     |
| Control-F     | 21.11                           | 1.12         | 72.35    | 17.11     |
| JLMT-device-R | 22.83                           | 1.20         | 79.44    | 21.76     |
| JLMT-device-F | 22.79                           | 1.19         | 79.26    | 21.50     |

**Table S3.** The mean and standard deviation of parameters of the PSCs.

|                    |                         | $V_{oc}$ (V) | $J_{sc}$ (mA cm <sup>-2</sup> ) | $FF$ (%) | $PCE$ (%) |
|--------------------|-------------------------|--------------|---------------------------------|----------|-----------|
| Mean               | MAPbI <sub>3</sub>      | 1.13         | 21.06                           | 72.45    | 17.58     |
|                    | JLMT-MAPbI <sub>3</sub> | 1.10         | 22.68                           | 75.60    | 21.26     |
| Standard deviation | MAPbI <sub>3</sub>      | 0.08         | 0.72                            | 3.40     | 0.75      |
|                    | JLMT-MAPbI <sub>3</sub> | 0.03         | 0.48                            | 3.08     | 0.25      |

**Table S4.** Fitting results from the EIS of PSCs based on the control and BDP-device.

|             | $R_s$ ( $\Omega \text{ cm}^2$ ) | $R_{tr}$ ( $\Omega \text{ cm}^2$ ) | $R_{rec}$ ( $\Omega \text{ cm}^2$ ) |
|-------------|---------------------------------|------------------------------------|-------------------------------------|
| Control     | 155                             | 8292                               | 72600                               |
| JLMT-device | 119                             | 7465                               | 101700                              |
